# Supplementary material
Source: PubMed Central journal article supplement (PMC523391)
Supplement: plntphys_136_2_3319__1.pdf [file plntphys_136_2_3319__1.pdf]

**Supplemental Table I.** *Putative 5'Oligopyrimidine tracts in maize ribosomal protein mRNAs*

| Ribosomal protein mRNA       | GenBank Accession number | Localization                             | Number consecutive pyrimidines | 5'-Terminal sequences |
|------------------------------|--------------------------|------------------------------------------|--------------------------------|-----------------------|
| ribosomal protein S6 kinase  | AY389497                 | nuclear gene for cytosolic product       | 8                              | CUUUCUCU              |
| ribosomal protein S9         | AF332375                 | nuclear gene for chloroplast product     | 10                             | CUUCUCUUC             |
| ribosomal protein S10        | AF287341                 | nuclear gene for mitochondrial product   | 9                              | CCCUUCCCC             |
| ribosomal protein L17        | AF034948                 | nuclear gene for cytosolic product (60S) | 8                              | CCUUCUUC              |
| acidic ribosomal protein P2b | U62753                   | nuclear gene for cytosolic product (60S) | 12                             | CUUCUUCUCUUC          |
| acidic ribosomal protein P3a | U62751                   | nuclear gene for cytosolic product (60S) | 8                              | CCUUCUCC              |
| ribosomal protein P3a        |                          |                                          | 19                             | CCCCUUCCUCUCUCCCUCC   |
| ribosomal protein S6         | U92045                   | nuclear gene for cytosolic product (40S) | 7                              | CUCCUUC               |
| ribosomal protein L12        | U40147                   | nuclear gene for cytosolic product (60S) | 8                              | CCUCUCUC              |

**Supplemental Table II.** *5'Oligopyrimidine tracts in maize mRNAs*

| mRNA                                                                   | GenBank<br>Accession<br>number | Putative 5'TOP<br>sequence | Maximum<br>number<br>of<br>consecutive<br>pyrimidines<br>after a C | Sequence of the putative<br>5'TOP |
|------------------------------------------------------------------------|--------------------------------|----------------------------|--------------------------------------------------------------------|-----------------------------------|
| heat shock<br>protein HSP101                                           | AF133840                       | NO                         | 3                                                                  | –                                 |
| Iron-<br>phytosiderophore<br>transporter<br>protein yellow<br>stripe 1 | AF186234                       | NO                         | 4                                                                  | –                                 |
| calreticulin                                                           | AF190454                       | NO                         | 5                                                                  | –                                 |
| cellulose synthase-1                                                   | AF200525                       | NO                         | 4                                                                  | –                                 |
| cellulose synthase-2                                                   | AF200526                       | NO                         | 6                                                                  | –                                 |
| cellulose synthase-4                                                   | AF200528                       | YES                        | 11<br>13                                                           | CCTTTTCTCTC<br>CCCTCCTCCCCC       |
| cellulose synthase-7                                                   | AF200531                       | NO                         | 5                                                                  | –                                 |
| cellulose synthase-8                                                   | AF200532                       | NO                         | 5                                                                  | –                                 |
| profilin                                                               | AF201459                       | NO                         | 4                                                                  | –                                 |
| ZM RR1-<br>response regulator                                          | AB004882                       | NO                         | 4                                                                  | –                                 |
| Squalene synthase                                                      | AB007502                       | NO                         | 6                                                                  | –                                 |
| Phosphoenol<br>pyruvate                                                | AB012228                       | YES                        | 16                                                                 | CTCCTCCTCCTCCTCC                  |

|                       |          |     |    |  |            |
|-----------------------|----------|-----|----|--|------------|
| carboxylase           |          |     |    |  |            |
| MAP kinase 4          | AB016810 | YES | 10 |  | CCTCTTCCTC |
| ferredoxin            | AB016810 | NO  | 5  |  | -          |
| Phosphoenol           | AB018744 | NO  | 3  |  | -          |
| pyruvate carboxykinas |          |     |    |  |            |
| Zm RCP2-root C        | AB021176 | NO  | 3  |  | -          |
| protein 2             |          |     |    |  |            |
| Zm RR2                | AB024291 | NO  | 5  |  | -          |
| Nonclathrin           | AB040667 | NO  | 5  |  | -          |
| coat protein          |          |     |    |  |            |
| zeta 2-COP            |          |     |    |  |            |
| Zm HK1-               | AB042270 | NO  | 2  |  | -          |
| histidine kinase 1    |          |     |    |  |            |
